# Supplementary material for: Correction of the Exon 2 Duplication in DMD Myoblasts by a Single CRISPR/Cas9 System
Source: PubMed Central journal article supplement — Mol Ther Nucleic Acids. 2017 Feb 10;7:11–9. doi: 10.1016/j.omtn.2017.02.004 (PMC5363679; doi:10.1016/j.omtn.2017.02.004), 2017-02-10
Supplement: mmc1.pdf [file mmc1.pdf]

**OMTN, Volume 7**

## **Supplemental Information**

### **Correction of the Exon 2 Duplication in DMD**

#### **Myoblasts by a Single CRISPR/Cas9 System**

**Annalisa Lattanzi, Stephanie Duguez, Arianna Moiani, Araksya Izmiryan, Elena Barbon, Samia Martin, Kamel Mamchaoui, Vincent Mouly, Francesco Bernardi, Fulvio Mavilio, and Matteo Bovolenta**

**SUPPLEMENTARY FIGURES AND TABLES**

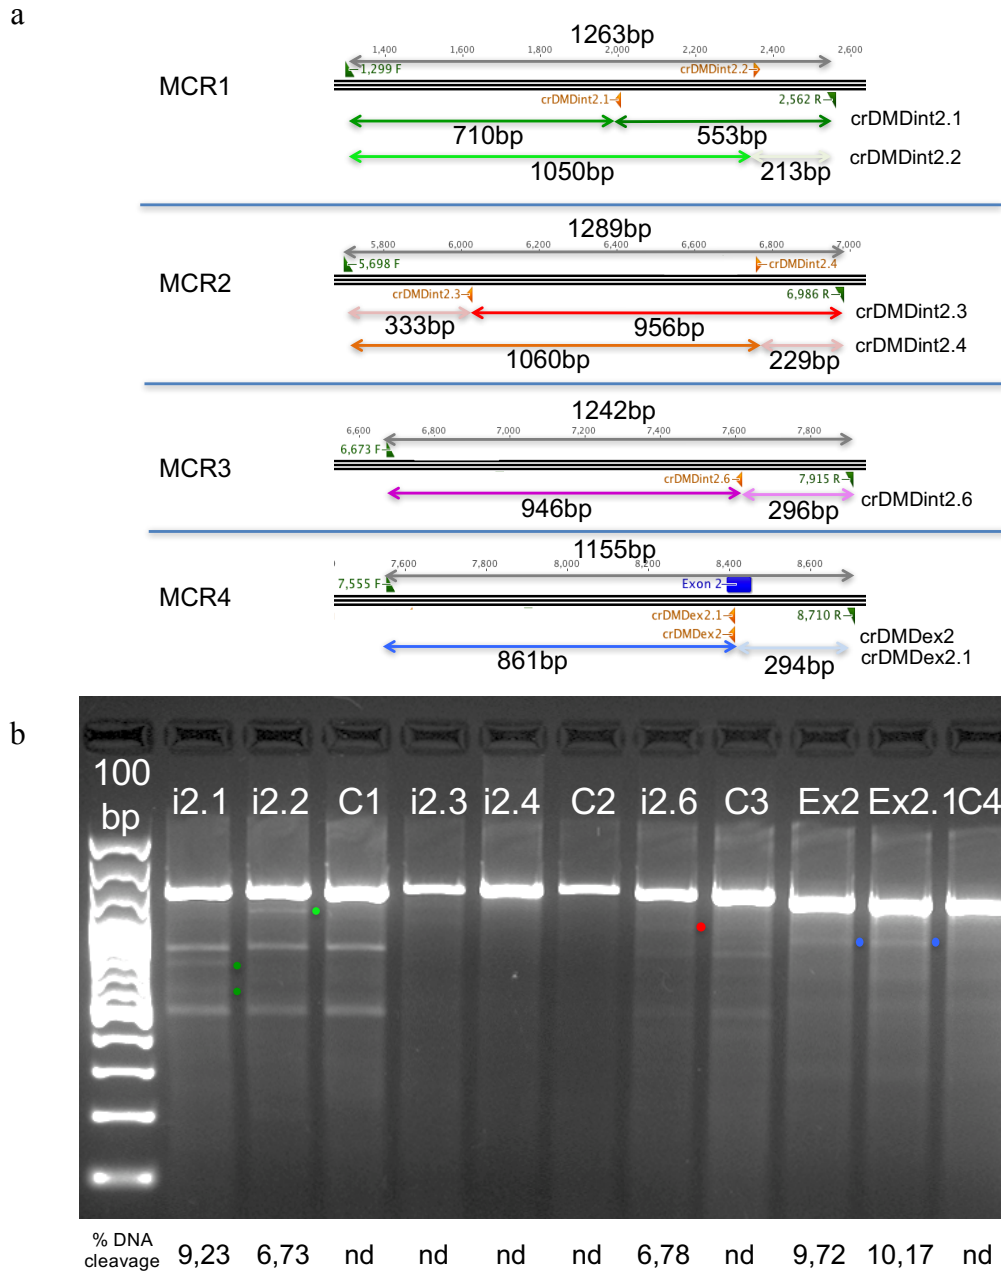

**Figure S1. Testing gRNAs for NHEJ indel formation in HEK293T cells:** (a) schematic of the PCR systems designed to amplify four regions of the minimal common duplicated region (MCR). For each region the intervening gRNAs are shown and predicted fragments generated by the T7E1 treatment are color-coded. (b) T7E1 assay of PCR products from HEK293T cells transfected with MLM3636 gRNA plasmids and spCas9 (JDS246). Coloured Dots indicate the position of T7E1 digestion fragments related to the activity of the gRNAs. Percentage of DNA cleavage is reported below each lane.

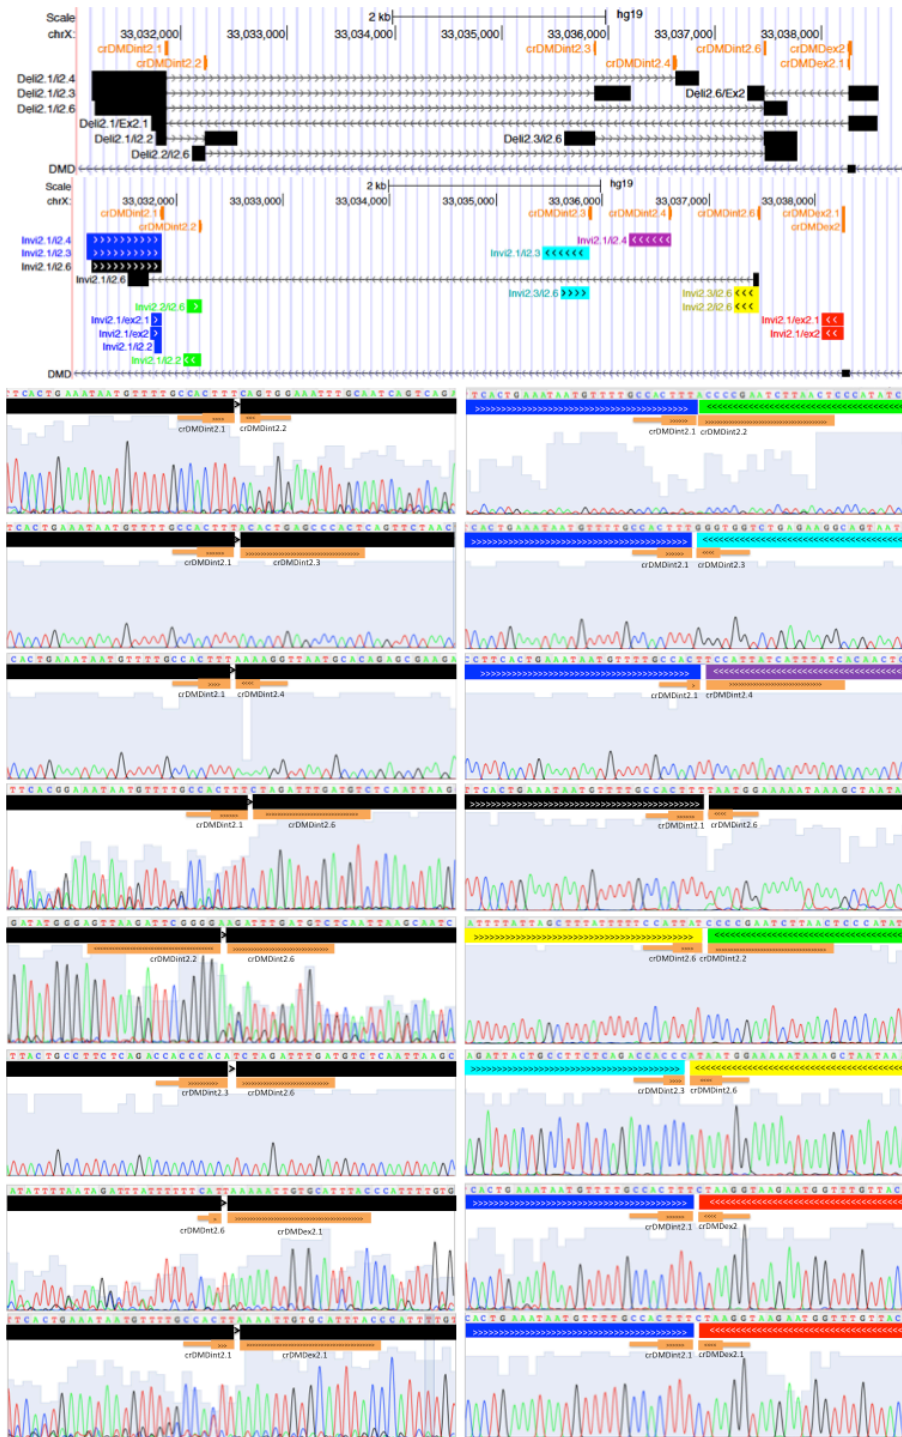

**Figure S2: Characterization of deletion and Inversion Breakpoints.**

Visualization of deletions and inversions caused by the activity of two gRNAs obtained by loading the resulting sequences (left panels: deletions; right panels: inversions) in UCSC Genome Browser and creating two custom tracks.

The sequences of each gRNA are overlaid over the chromatograms and represented by an orange thick bar for the PAM sequence and arrowed orange bars for the binding sequences. Deletion breakpoints are represented as black arrows between two black bars whereas inversion is shown as colour-coded bars with arrows indicating the original orientation of the sequence.

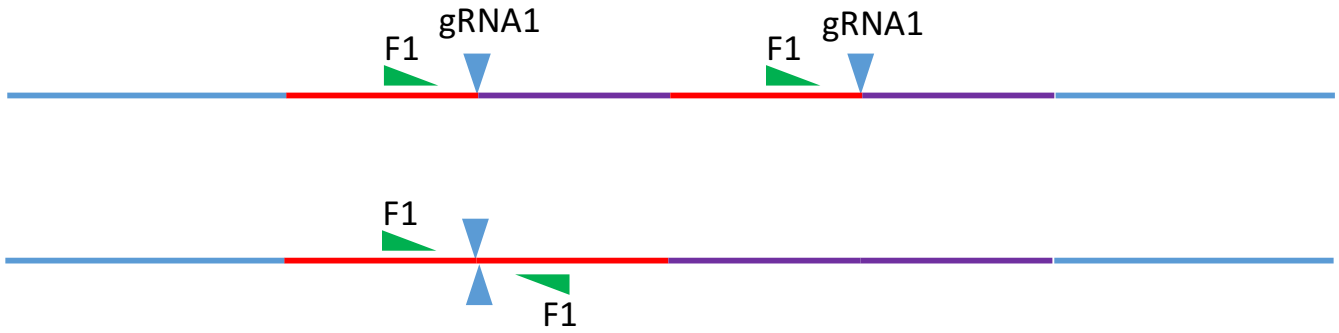

**Figure S3:** Strategy to amplify inversions of the duplicated region caused by activity of a gRNA with one primer. The primer and the gRNA are represented as green and light blue triangles respectively. The tandem duplication is coloured in red and violet in order to easily recognise the inversion in the scheme.

**Deletions** PAM gRNA Int2.1  
TACCTCCTTCACTGAAATAATGTTTTG**CCACTTTGTC**CCAGTATCATCTTTTTTAAAAAAGTTCTAAGCTCATTTTAAAT WT 26.3% (29/110)

TACCTCCTTCACTGAAATAATGTTTTGCCACTT-GTCCCAGTATCATCTTTTTTAAAAAAGTTCTAAGCTCATTTTAAAT x13  
TACCTCCTTCACTGAAATAATGTTTTGCCACTTT---CCCAGTATCATCTTTTTTAAAAAAGTTCTAAGCTCATTTTAAAT x8  
TACCTCCTTCACTGAAATAATGTTTTGCCACT---CCCAGTATCATCTTTTTTAAAAAAGTTCTAAGCTCATTTTAAAT x3  
TACCTCCTTCACTGAAATAATGTTTTGCCACTT----CAGTATCATCTTTTTTAAAAAAGTTCTAAGCTCATTTTAAAT x2  
TACCTCCTTCACTGAAATAATGTTTTGCCACTTT---CCAGTATCATCTTTTTTAAAAAAGTTCTAAGCTCATTTTAAAT  
TACCTCCTTCACTGAAATAATGTTTTGCCACTT---CAGTATCATCTTTTTTAAAAAAGTTCTAAGCTCATTTTAAAT  
TACCTCCTTCACTGAAATAATGTTTTGCCACTT---CCCAGTATCATCTTTTTTAAAAAAGTTCTAAGCTCATTTTAAAT  
TACCTCCTTCACTGAAATAATGTTTTGCCACTT----AGTATCATCTTTTTTAAAAAAGTTCTAAGCTCATTTTAAAT  
TACCTCCTTCACTGAAATAATGTTTTGCCACTT-----ATCATCTTTTTTAAAAAAGTTCTAAGCTCATTTTAAAT  
TACCTCCTTCACTGAAATAATGTTTTGCCACTTT-----TTTAAAAAAGTTCTAAGCTCATTTTAAAT  
TACCTCCTTCACTGAAATAATGTTTTGCCACTTTG-----ATTTTAAAT  
TACCTCCTTCACTGAAATAATGTTTTGCCACTTT----- (133) -----ATGTTACTGGGTGTG  
Deletions: 30.9% (34/110)

**Insertions**  
TACCTCCTTCACTGAAATAATGTTTTGCCACTTT---GT---CCCAGTATCATCTTTTTTAAAAAAGTTCTAAGCTCATTTTAAAT WT

TACCTCCTTCACTGAAATAATGTTTTGCCACTTT--**TGT**---CCCAGTATCATCTTTTTTAAAAAAGTTCTAAGCTCATTTTAAAT insT x41  
TACCTCCTTCACTGAAATAATGTTTTGCCACTTT-**ATGT**---CCCAGTATCATCTTTTTTAAAAAAGTTCTAAGCTCATTTTAAAT insAT x2  
TACCTCCTTCACTGAAATAATGTTTTGCCACTTT**TATGT**---CCCAGTATCATCTTTTTTAAAAAAGTTCTAAGCTCATTTTAAAT insTAT  
TACCTCCTTCACTGAAATAATGTTTTGCCACTTT**CTTGT**---CCCAGTATCATCTTTTTTAAAAAAGTTCTAAGCTCATTTTAAAT insCTT  
TACCTCCTTCACTGAAATAATGTTTTGCCACTTT---GT**G**CCCAGTATCATCTTTTTTAAAAAAGTTCTAAGCTCATTTTAAAT insG  
Insertions: 41.8% (46/110)

**Indels**  
TACCTCCTTCACTGAAATAATGTTTTGCCACTTT---**C**---CCCAGTATCATCTTTTTTAAAAAAGTTCTAAGCTCATTTTAAAT insC delGT  
Indels: 0.01% (1/110)

**Total Mutations: 72.71%**

| Potential off-target site #                                          | Sequence                            | Indels (%) | Chromosome # | Strand | Position  | GENE            | Mismatch #1 | Mismatch #2 | Mismatch #3 |
|----------------------------------------------------------------------|-------------------------------------|------------|--------------|--------|-----------|-----------------|-------------|-------------|-------------|
| Site Of Interest                                                     | GATGATACTGGGACAAAG                  | 72.71%     |              |        |           | DMD, intronic   |             |             |             |
| Potential Off-Target site # 1                                        | GTTGAA <b>A</b> CTGGGACAAAG         | nd         | chr6         | -      | 105368929 | none            | 1:A>T       | 5:T>A       |             |
| Potential Off-Target site # 2                                        | GA <b>A</b> GATACTGGG <b>A</b> AAAG | nd         | chr2         | +      | 217969247 | none            | 2:A>T       | 13:G>C      |             |
| Potential Off-Target site # 3                                        | GATGAGACTGGG <b>A</b> AAAG          | nd         | chr12        | +      | 90417929  | none            | 5:G>T       | 13:G>C      |             |
| Potential Off-Target site # 4                                        | GATGAC <b>A</b> GTTGGGACAAAG        | nd         | chr2         | -      | 11851832  | LPIN1, intronic | 5:G>A       | 7:C>G       |             |
| Potential Off-Target site # 6                                        | G <b>T</b> TCACACTGGGACAAAG         | nd         | chr1         | -      | 162675015 | none            | 1:C>T       | 3:G>C       | 5:G>A       |
| Potential Off-Target site # 16                                       | GA <b>A</b> CAGACTGGGACAAAG         | nd         | chr11        | -      | 8381632   | none            | 2:T>A       | 3:G>C       | 5:C>A       |
| Potential Off-Target site # 57                                       | GATGATACTGG <b>A</b> GACAAAT        | nd         | chr16        | -      | 87824358  | none            | 10:T>C      | 17:A>C      |             |
| Potential Off-Target site # 58                                       | GATGATACTGGG <b>A</b> GAAAA         | nd         | chr17        | +      | 60562033  | TLK2, intronic  | 13:G>C      | 17:A>G      |             |
| Potential Off-Target site # 59                                       | GATGATACTGGG <b>A</b> AAAA          | nd         | chr7         | +      | 128177242 | none            | 13:G>C      | 17:A>G      |             |
| Potential Off-Target site # 91                                       | GATGATACTG <b>T</b> GATAAAG         | nd         | chr14        | +      | 66373651  | none            | 10:T>G      | 13:T>C      |             |
| Potential Off-Target site # 92                                       | GATGATA <b>A</b> TGGTACAAAG         | nd         | chr5         | -      | 13605091  | none            | 7:T>G       | 11:A>C      |             |
| Potential Off-Target site # 93                                       | GTT <b>C</b> CACTGGGACAAAG          | nd         | chrX         | +      | 48165879  | RNLP, intronic  | 1:T>A       | 4:C>A       | 5:C>T       |
| Potential Off-Target site # 99                                       | G <b>A</b> CTCTACTGGGACAAAG         | nd         | chr11        | +      | 23900800  | none            | 2:C>T       | 3:T>G       | 4:C>A       |
| Summary: Off by 0 = 1; Off by 1 = 0;<br>Off by 2 = 9; Off by 3 = 143 |                                     |            |              |        |           |                 |             |             |             |

**Figure S4. On-target and Off-target analysis of the crDMDint2.1:** On target activity of the crDMDint2.1 gRNA in myoblasts infected with LV\_int2.1 particles. Representative sequences of mutated alleles identified from 110 clonal amplicons. Dashes, deleted bases; red bases, insertions or mutations. Table summary of the on- and off-target analysis based on the Zifit software. Only off-targets with two mismatches or three mismatches (red bases) outside the seed gRNA region were tested and are shown.

| Name        | Forward                           | Reverse                             |
|-------------|-----------------------------------|-------------------------------------|
| crDMDex2    | ACACCGGTAAATGCACAATTTTCTAG        | AAAAC TAGAAAATTGTGCATTTACCG         |
| crDMDex2.1  | <b>A</b> CACCGTAAATGCACAATTTTCTAG | <b>A</b> AAAAC TAGAAAATTGTGCATTTACG |
| crDMDint2.1 | <b>A</b> CACCGATGATACTGGGACAAAGG  | <b>A</b> AAAACCTTTGTCCCAGTATCATCG   |
| crDMDint2.2 | ACACCGTTAAGATTCGGGGACAGG          | AAAACCTGTCCCCGAATCTTAACG            |
| crDMDint2.3 | ACACCGAGTGGGCTCAGTGTGGGG          | AAAACCCACACTGAGCCCACTCG             |
| crDMDint2.4 | ACACCGATAAATGATAATGGAAAG          | AAAAC TTCCATTATCATTTATCG            |
| crDMDint2.6 | <b>A</b> CACCGACATCAAATCTAGATAAG  | <b>A</b> AAAAC TTATCTAGATTTGATGTCG  |

**Table S1:** Primers used to clone the DMD gRNAs into MLM3636.

The nucleotides that were removed to clone the gRNAs into the LentiCRISPRv2 are shown in red.

| Name           | Sequence                 | Target                                       |
|----------------|--------------------------|----------------------------------------------|
| 1299F          | CTGCCTGCTTCTCATAGGACTT   | Minimal common region 1                      |
| 2562R          | AACACGGAAGGTTTGTCTGATG   |                                              |
| 5698F          | AGTTGTATGAATGTGTGTGTGCC  | Minimal common region 2                      |
| 6986R          | TGGAATTCTGAAGCAGACAAGAGA |                                              |
| 6673F          | AATTGCTCTGAGGCAGTGCTAA   | Minimal common region 3                      |
| 7915R          | TGTGCAGGCTTCAATCCATACT   |                                              |
| 7555F          | TAAAGCCTTGGGTTTAAGGGCC   | Minimal common region 4                      |
| 8710R          | GTGATCCGTCCTCACTGGC      |                                              |
| i2.1Offchr5F   | CCAGCTGCCGAAGATTCAT      | Potential Off-Target site #92 chr5:13605091  |
| i2.1Offchr5R   | CATCTCCCAGAAACACAGCA     |                                              |
| i2.1Offchr14F  | ATTCAGGTCCATGGAGGCAG     | Potential Off-Target site #91 chr14:66373651 |
| i2.1Offchr14R  | CTCTTTTCCTTCGCCCTCCC     |                                              |
| i2.1Offchr7F   | TCTCAGCTCACTGCAACCTC     | Potential Off-Target site #59 chr7:128177242 |
| i2.1Offchr7R   | TAGCCAGGATGGTCTCGATC     |                                              |
| i2.1Offchr17F  | AGCAATTCTCGTGCCCTCAGC    | Potential Off-Target site #58 chr17:60562033 |
| i2.1Offchr17R  | CACCCACCACCAAGCTCAG      |                                              |
| i2.1Offchr16F  | AGCTGCTCTTTGGGGTCTTC     | Potential Off-Target site #57 chr16:87824358 |
| i2.1Offchr16R  | GCCTTGTGATCCACTCCCAA     |                                              |
| i2.1Offchr2aF  | TACCCAGCAAGGATCCAGA      | Potential Off-Target site #04 chr2:11851832  |
| i2.1Offchr2aR  | CAGAGCAGTGTGAGAGCAGT     |                                              |
| i2.1Offchr12F  | TGGGTGAGGATGGAGAGGAG     | Potential Off-Target site #03 chr12:90417929 |
| i2.1Offchr12R  | ATCCGGGCCCTATGCTATCT     |                                              |
| i2.1Offchr2bF  | TATGGCAGTAGGGGCTGGAT     | Potential Off-Target site #02 chr2:217969247 |
| i2.1Offchr2bR  | TCTCTCTGGCTTAGACTTCCA    |                                              |
| i2.1Offchr6F   | CAGCCTAGGTGACAGAGCAA     | Potential Off-Target site #01 chr6:105368929 |
| i2.1Offchr6R   | GTTGCACTGAGCCGAAGATG     |                                              |
| i2.1Offchr1F   | GAGACCGTGTTTCCTGTAGC     | Potential Off-Target site #06 chr1:162675015 |
| i2.1Offchr1R   | TAGAGTTGCCCCCTGATCCA     |                                              |
| i2.1OffchrXF   | CGACCTGCCTCACATACT       | Potential Off-Target site #93 chrX:48165879  |
| i2.1OffchrXR   | TAACCCGAGATCCAGGCATG     |                                              |
| i2.1Offchr11aF | AAGGGCCTGACACTTTCCTG     | Potential Off-Target site #16 chr11:8381632  |
| i2.1Offchr11aR | CCTGAACCCAAACAAGACCCT    |                                              |
| i2.1Offchr11bF | AGCCAATTTTCCCTCACACCA    | Potential Off-Target site #99 chr11:23900800 |
| i2.1Offchr11bR | GTAGCTGGGACTACAGGCAC     |                                              |

**Table S2:** Primers used for the amplification for the gRNAs on-target and crDMDint2.1 off-target analysis.

| Name         | Sequence                       | Name         | Sequence                      | Target                 |
|--------------|--------------------------------|--------------|-------------------------------|------------------------|
| <u>1861F</u> | <u>TCTGTAAAGCAGGCACATTGC</u>   | 2194F        | GTTTGATGCCAAGAAGGTAGCC        | i2.1/i2.2 inversion    |
|              |                                | 2666R        | GTGTCCTGGTTTTTCAGTGCATT       | i2.1/i2.2 deletion     |
| 1861F        | TCTGTAAAGCAGGCACATTGC          | 5698F        | AGTTGATGAATGTGTGTGTGCC        | i2.1/i2.3 inversion    |
|              |                                | 6154R        | GCCTTTCAGCAGAATTCTAGCC        | i2.1/i2.3 deletion     |
| 1861F        | TCTGTAAAGCAGGCACATTGC          | 2194F        | GTTTGATGCCAAGAAGGTAGCC        | i2.1/i2.2 inversion    |
|              |                                | 2666R        | GTGTCCTGGTTTTTCAGTGCATT       | i2.1/i2.2 deletion     |
| 1861F        | TCTGTAAAGCAGGCACATTGC          | 6673F        | AATTGCTCTGAGGCAGTGCTAA        | i2.1/i2.4 inversion    |
|              |                                | 6986R        | TGGAATTCTGAAGCAGACAAGAGA      | i2.1/i2.4 deletion     |
| 1861F        | TCTGTAAAGCAGGCACATTGC          | 7377F        | TCTCCTAGTGGATTGTTTTGGCT       | i2.1/i2.6 inversion    |
|              |                                | 7915R        | TGTGCAGGCTTCAATCCATACT        | i2.1/i2.6 deletion     |
| 1861F        | TCTGTAAAGCAGGCACATTGC          | <u>8209F</u> | <u>TTTGCCATATCTTCTGCTGCTT</u> | i2.1/ex2-2.1 inversion |
|              |                                | 7915R        | TGTGCAGGCTTCAATCCATACT        | i2.1/ex2-2.1 deletion  |
| 2194F        | GTTTGATGCCAAGAAGGTAGCC         | 7377F        | TCTCCTAGTGGATTGTTTTGGCT       | i2.2/i2.6 inversion    |
|              |                                | 7915R        | TGTGCAGGCTTCAATCCATACT        | i2.2/i2.6 deletion     |
| 5698F        | AGTTGATGAATGTGTGTGTGCC         | 7377F        | TCTCCTAGTGGATTGTTTTGGCT       | i2.3/i2.6 inversion    |
|              |                                | 7915R        | TGTGCAGGCTTCAATCCATACT        | i2.3/i2.6 deletion     |
| 6673F        | AATTGCTCTGAGGCAGTGCTAA         | 7377F        | TCTCCTAGTGGATTGTTTTGGCT       | i2.4/i2.6 inversion    |
|              |                                | 7915R        | TGTGCAGGCTTCAATCCATACT        | i2.4/i2.6 deletion     |
| <u>7377F</u> | <u>TCTCCTAGTGGATTGTTTTGGCT</u> | 8209F        | TTTGCCATATCTTCTGCTGCTT        | i2.6/ex2-2.1 inversion |
|              |                                | 8710R        | GTGATCCGTCCTCACTGGC           | i2.6/ex2-2.1 deletion  |

**Table S3:** List of primers used to amplify the duplications' and inversions' breakpoints. Primers used to amplify inversions in dup2 myoblasts are underlined in the present table.
